# Supplementary material
Source: MDPI journal article supplement (https://www.mdpi.com/2624-960X/3/2/21)
Supplement: s1 [file s1]

## Supplementary material

# Quantum Circuit Learning with Error Backpropagation Algorithm and Experimental Implementation

Masaya Watabe<sup>1</sup>, Kodai Shiba<sup>1,2</sup>, Chih-Chieh Chen<sup>2</sup>, Masaru Sogabe<sup>2</sup>, Katsuyoshi Sakamoto<sup>1,3</sup>, Tomah Sogabe<sup>1,2,3\*</sup>

<sup>1</sup> Engineering department, The University of Electro-Communications, Tokyo, Japan

<sup>2</sup> Grid, Inc. Tokyo, Japan

<sup>3</sup> i-PERC, The University of Electro-Communications, Tokyo, Japan

E-mail: sogabe@uec.ac.jp

### S.A Dot product node

Backpropagation of dot product node.

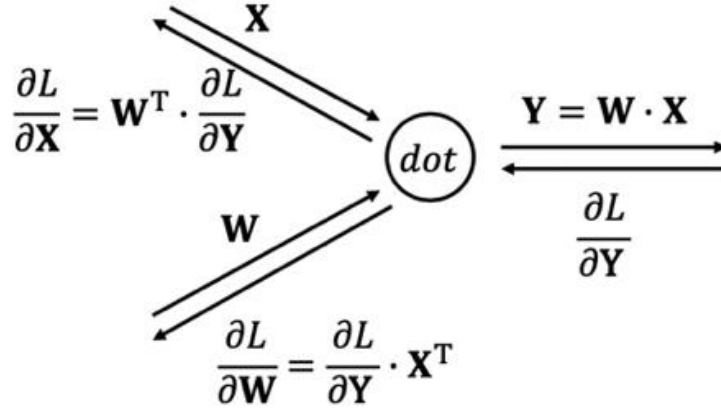

Figure 1 Graph of dot product node.

$\mathbf{X}$  is an input state. The size of  $\mathbf{X}$  corresponds to  $N (= 2^n)$  of states with  $n$  qubits.  $\mathbf{W}$  is the network weights and corresponds to a gate in the quantum circuit. The size is  $N \times N$ .

$$\mathbf{X} = (x_1, x_2, \dots, x_N)^T$$
$$\mathbf{W} = \begin{bmatrix} w_{1,1} & \cdots & w_{1,N} \\ \vdots & \ddots & \vdots \\ w_{N,1} & \cdots & w_{N,N} \end{bmatrix}$$

Output  $\mathbf{Y}$  is written as  $\mathbf{Y} = \mathbf{W} \cdot \mathbf{X}$ . Here, when there is a gradient  $\frac{\partial L}{\partial \mathbf{Y}}$  with respect to  $\mathbf{Y}$  of the loss function  $L$ , the gradient of each  $L$  with respect to  $\mathbf{X}$  and  $\mathbf{W}$  is calculated as follows.

$$\frac{\partial L}{\partial \mathbf{X}} = \mathbf{W}^T \cdot \frac{\partial L}{\partial \mathbf{Y}}$$

$$\frac{\partial L}{\partial \mathbf{W}} = \frac{\partial L}{\partial \mathbf{Y}} \cdot \mathbf{X}^T$$

### S.B Rotation gate $U(\theta)$ node

The weight  $\mathbf{W}$  in the full-connected network is made to correspond to the rotation gate in the quantum circuit.

$$\mathbf{W} = \begin{bmatrix} w_{1,1} & w_{1,2} \\ w_{2,1} & w_{2,2} \end{bmatrix} = \begin{bmatrix} u_{1,1}(\theta) & u_{1,2}(\theta) \\ u_{2,1}(\theta) & u_{2,2}(\theta) \end{bmatrix} = \mathbf{U}(\theta)$$

Unlike conventional fully-connected networks, the elements of the unitary gate  $\mathbf{U}(\theta)$  matrix are not independent of each other and have a common parameter  $\theta$ . Therefore, the gradient of  $L$  with respect to  $\theta$  is obtained by backpropagation using the calculation graph shown in Fig. 2.

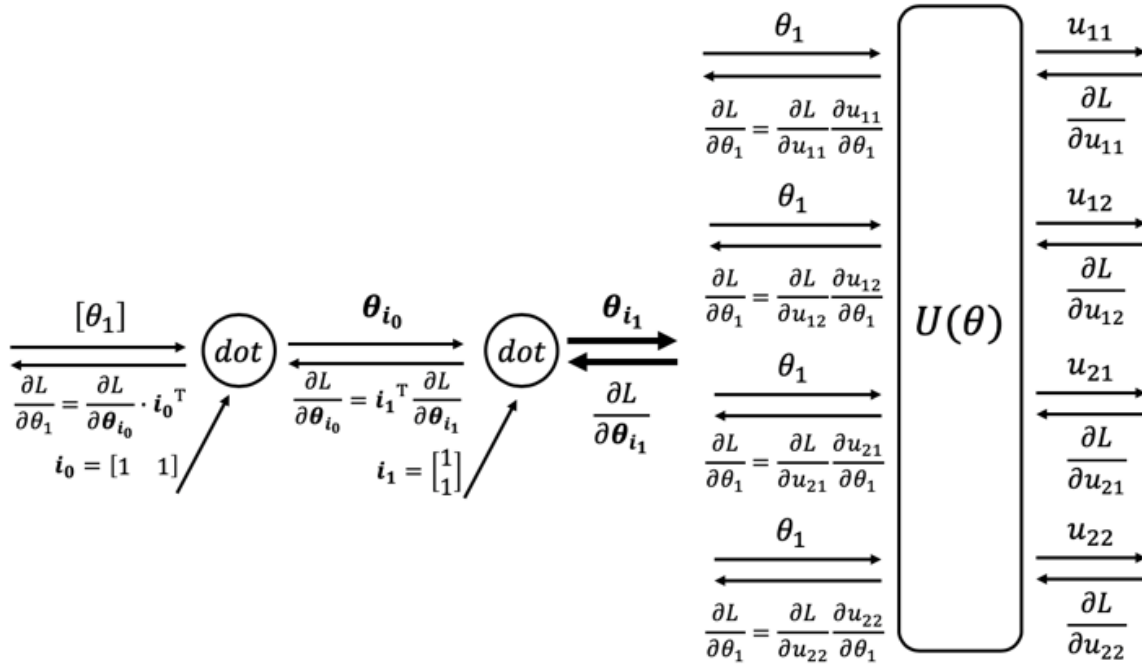

Figure 2 Graph of rotation gate  $U(\theta)$  node

For example, we chose  $R_Y$  gate,

$$U(\theta) = \mathbf{R}_Y(\theta) = \begin{bmatrix} \cos \frac{\theta}{2} & -\sin \frac{\theta}{2} \\ \sin \frac{\theta}{2} & \cos \frac{\theta}{2} \end{bmatrix},$$

$$\frac{\partial \mathbf{R}_Y(\theta)}{\partial \theta} = \begin{bmatrix} \frac{\partial u_{1,1}}{\partial \theta} & \frac{\partial u_{1,2}}{\partial \theta} \\ \frac{\partial u_{2,1}}{\partial \theta} & \frac{\partial u_{2,2}}{\partial \theta} \end{bmatrix} = \begin{bmatrix} -\sin \frac{\theta}{2} & -\cos \frac{\theta}{2} \\ \cos \frac{\theta}{2} & -\sin \frac{\theta}{2} \end{bmatrix},$$

We define vector  $\mathbf{i}_0 = [1 \ 1]$  and  $\mathbf{i}_1 = \mathbf{i}_0^T$ . The gradient is

$$\frac{\partial L}{\partial \theta_{i_1}} = \begin{bmatrix} \frac{\partial L}{\partial \theta} & \frac{\partial L}{\partial \theta} \\ \frac{\partial L}{\partial \theta} & \frac{\partial L}{\partial \theta} \end{bmatrix} = \begin{bmatrix} \frac{\partial L}{\partial u_{1,1}} \frac{\partial u_{1,1}}{\partial \theta} & \frac{\partial L}{\partial u_{1,2}} \frac{\partial u_{1,2}}{\partial \theta} \\ \frac{\partial L}{\partial u_{2,1}} \frac{\partial u_{2,1}}{\partial \theta} & \frac{\partial L}{\partial u_{2,2}} \frac{\partial u_{2,2}}{\partial \theta} \end{bmatrix},$$

$$\frac{\partial L}{\partial \theta_{i_0}} = \mathbf{i}_1^T \cdot \frac{\partial L}{\partial \theta_{i_1}},$$

$$\frac{\partial L}{\partial \theta} = \frac{\partial L}{\partial \theta_{i_0}} \cdot \mathbf{i}_0^T.$$

From above,

$$\frac{\partial L}{\partial \theta} = \frac{\partial L}{\partial \theta_{i_0}} \cdot \mathbf{i}_0^T = \left( \mathbf{i}_1^T \cdot \frac{\partial L}{\partial \theta_{i_1}} \right) \cdot \mathbf{i}_0^T$$

$$\frac{\partial L}{\partial \theta} = \frac{\partial L}{\partial u_{1,1}} \frac{\partial u_{1,1}}{\partial \theta} + \frac{\partial L}{\partial u_{1,2}} \frac{\partial u_{1,2}}{\partial \theta} + \frac{\partial L}{\partial u_{2,1}} \frac{\partial u_{2,1}}{\partial \theta} + \frac{\partial L}{\partial u_{2,2}} \frac{\partial u_{2,2}}{\partial \theta}$$

### S.C Observation Probability node

Output state  $|\psi_{out}\rangle$  is

$$|\psi_{out}\rangle = c_0|0\rangle + c_1|1\rangle + \dots + c_{N-1}|N-1\rangle,$$

where  $c_j$  is the probability amplitude and satisfies  $|c_0|^2 + |c_1|^2 + \dots + |c_{N-1}|^2 = 1$ .

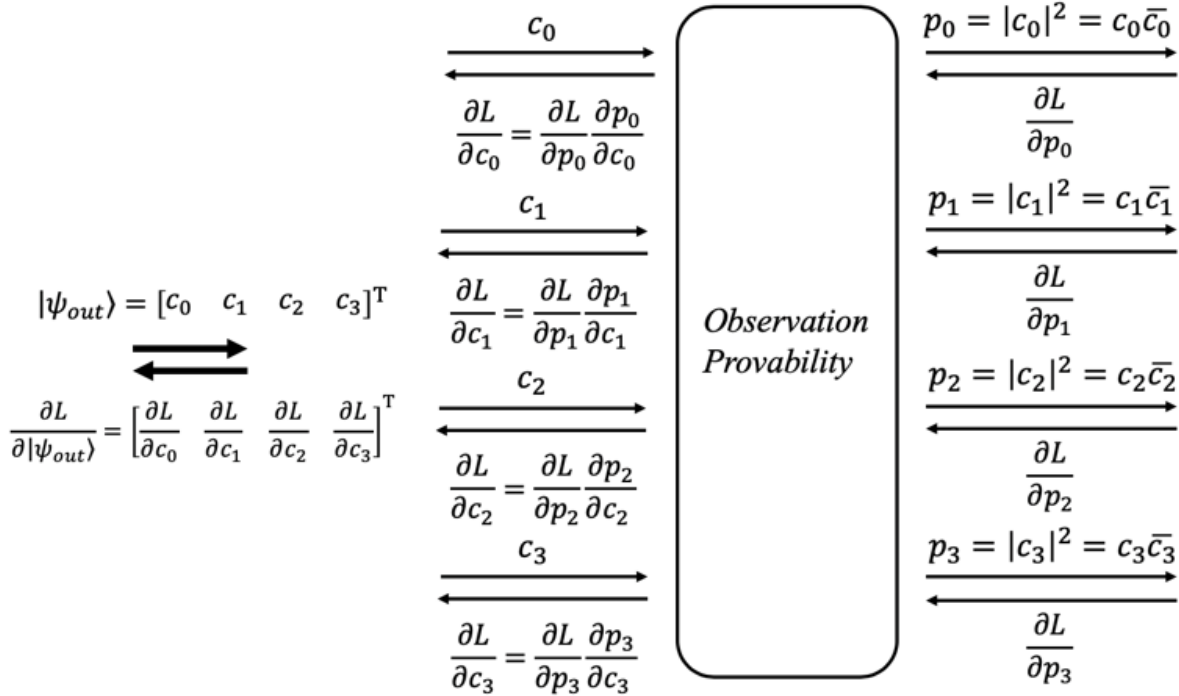

Figure 3 Graph of the probability amplitude node

The gradient of  $p_i$  with respect to a probability amplitude  $c_j$  can be calculated as follows.  $\bar{c}_i$  is the complex conjugate of  $c_j$ .

$$\frac{\partial p_j}{\partial c_j} = \frac{\partial}{\partial c_j}(c_j \bar{c}_j) = \bar{c}_j$$

***S.D Quantum circuit learning results with classification problems. The training data are added with noise.***

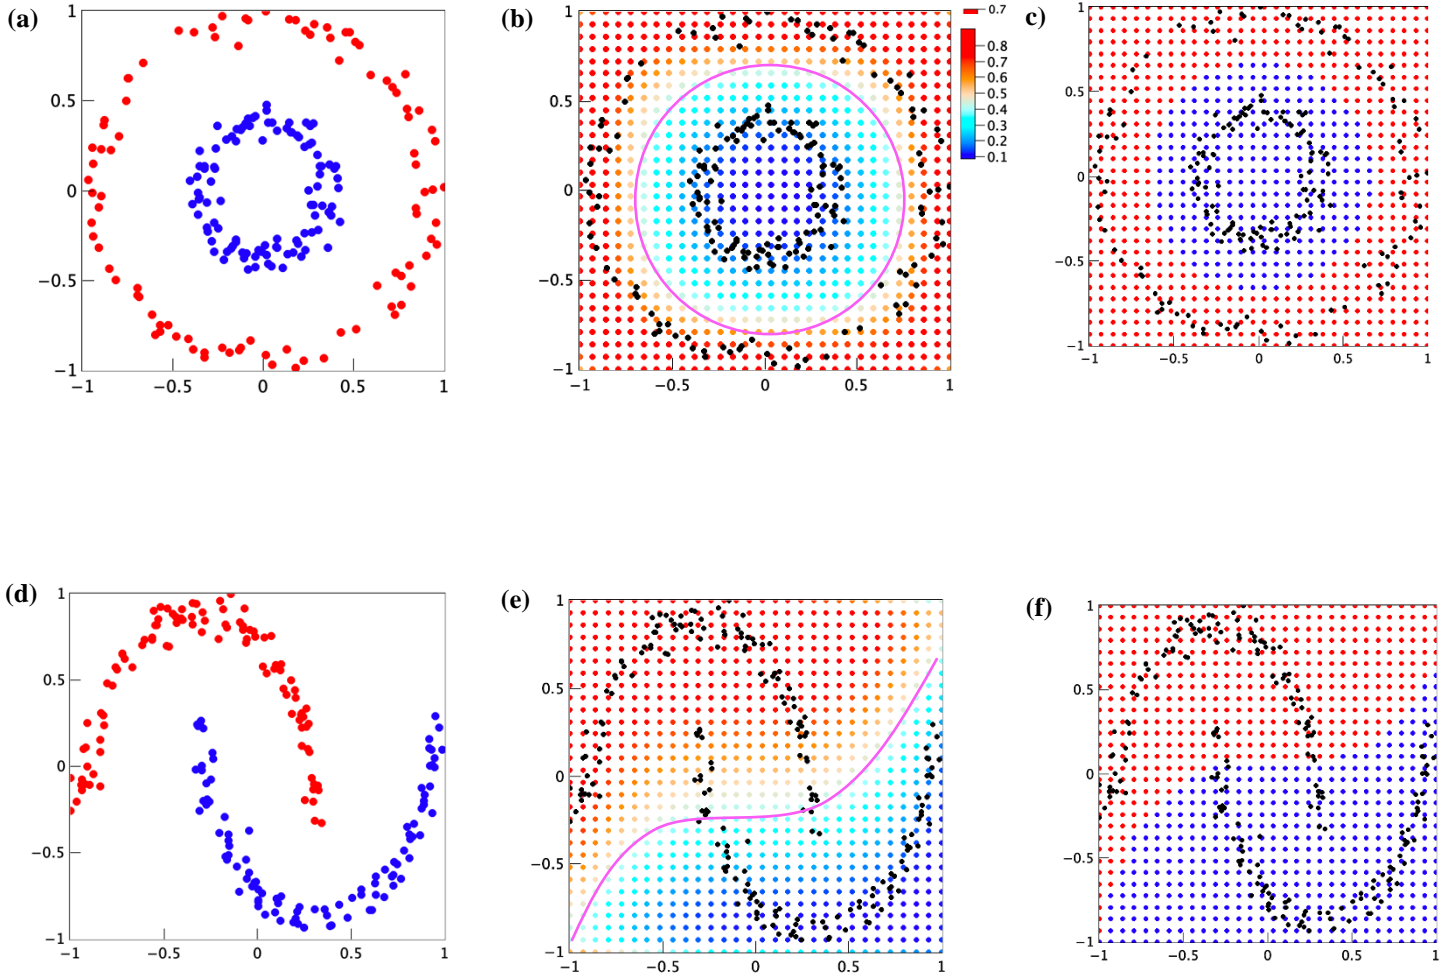

Figure 4 Quantum circuit learning results using error backpropagation for nonlinear binary classification problem with 4 qubit and 7 layer depth: (a) Training data set for make\_circles, red for label '0' and blue for label '1' ; (b) Test results using the learnt parameter using the 200 make\_circles dataset, pink line corresponding to the median boundary of the continuous probability; (c) scikit-learn-SVM classification results using the learnt support vectors; (d) Training data set for make\_moons, red for label '0' and blue for label '1' ;; (e) Test results using the learnt parameter under the 200 make\_moon dataset, pink line corresponding to the median boundary of the continuous probability; (f) scikit-learn-SVM classification results using the learnt support vectors.
